# Supplementary material for: Spatial Distribution of Inhibitory Innervations of Excitatory Pyramidal Cells by Major Interneuron Subtypes in the Auditory Cortex
Source: MDPI journal article supplement (doi:10.3390/bioengineering10050547), 2023-05-01
Supplement: s1 [file s1]

## Supplementary Material

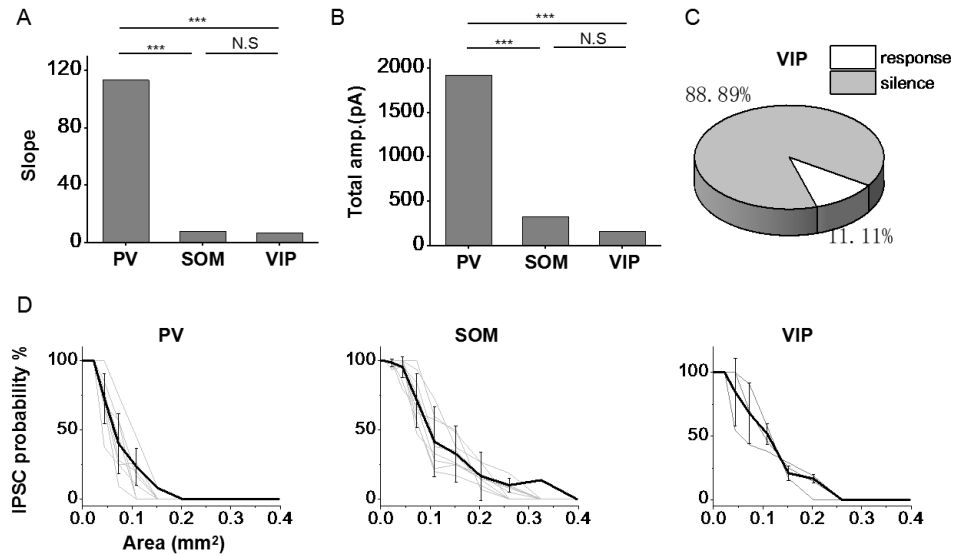

**Figure S1.** Connection efficiency comparison among the three inhibitory cell types for L4 PCs. **(A)** Slopes of the three curves in Figure 3B (PV: -113.24, SOM: -7.49, VIP: -6.43). **(B)** Comparison of total amplitude within ten laps for three interneurons (PV: 1920.25 pA, SOM: 320.52 pA, VIP: 155.35 pA). **(C)** Pie chart showing VIP connection (response N: 3/27). **(D)** IPSCs response probability in different stimulus area for three subtypes of interneurons. \*\*\* $p < 0.001$ , N.S,  $p > 0.05$ .

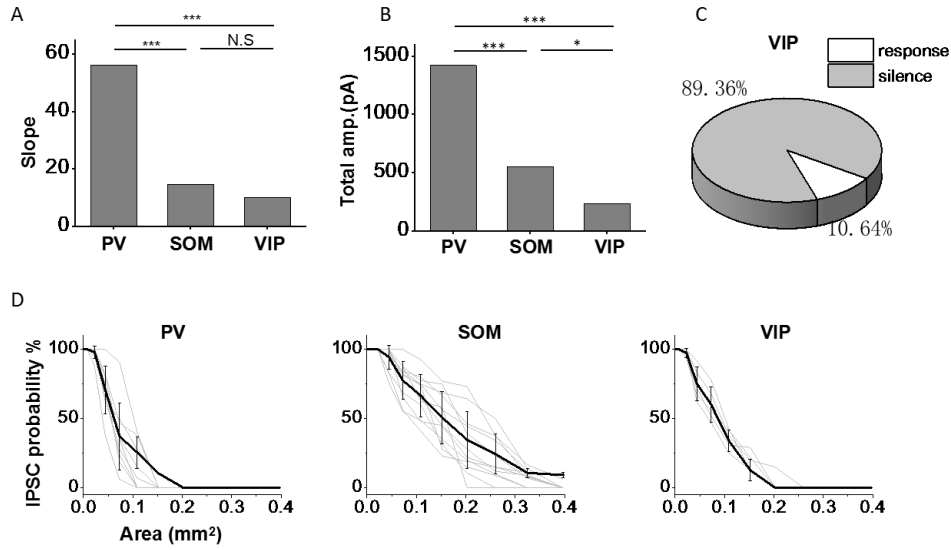

**Figure S2.** Connection efficiency comparison among the three inhibitory cell types for L5 PCs. **(A)** Slopes of the three curves in Figure 3E (PV: -56.31, SOM: -14.46, VIP: -10.01). **(B)** Comparison of total amplitude within ten laps for three interneurons (PV: 1419.78 pA, SOM: 552.28 pA, VIP: 231.30 pA). **(C)** Pie chart showing VIP connection (response N: 5/42). **(D)** IPSCs response probability in different stimulus area for three subtypes of interneurons. \*\*\* $p < 0.001$ , N.S.,  $p > 0.05$ .

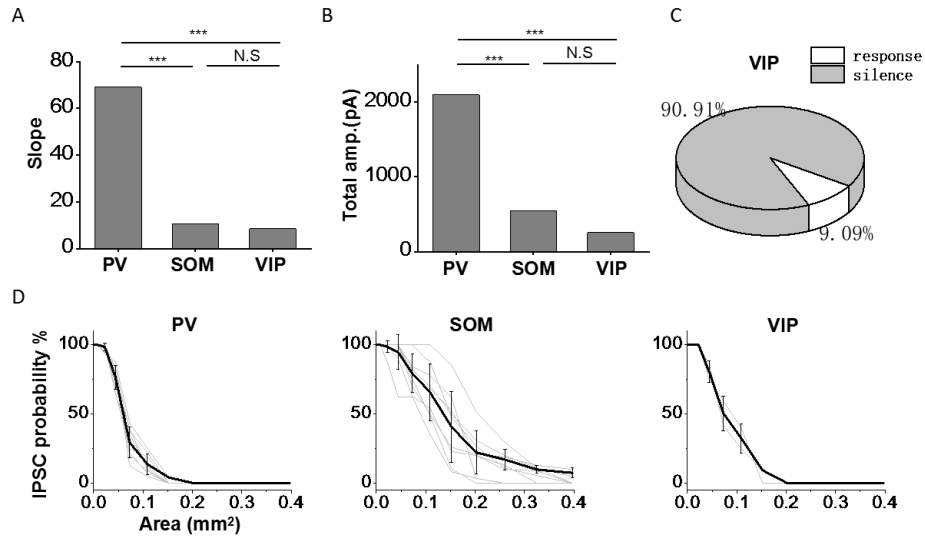

**Figure S3.** Connection efficiency comparison among the three inhibitory cell types for L6 PCs. **(A)** Slopes of the three curves in Figure 3H (PV: -69.17, SOM: -10.48, VIP: -8.47). **(B)** Comparison of total amplitude within ten laps for three interneurons (PV: 2100.88 pA, SOM: 554.72 pA, VIP: 255.48 pA). **(C)** Pie chart showing VIP connection (response N: 2/20). **(D)** IPSCs response probability in different stimulus area for three subtypes of interneurons. \*\*\* $p < 0.001$ , N.S.,  $p > 0.05$ .
